# Supplementary material
Source: PubMed Central journal article supplement (PMC6312182)
Supplement: NIHMS984474-supplement-1.pdf [file NIHMS984474-supplement-1.pdf]

Supplementary Table 1. Levels of inflammatory markers based on gender in CO-MED trial participants who provided plasma at baseline (n=166)

|                                                        | Total<br>(n=166) |      | Males<br>(n=49) |      | Females<br>(n=117) |      | T value<br>(df) | p-<br>value |
|--------------------------------------------------------|------------------|------|-----------------|------|--------------------|------|-----------------|-------------|
|                                                        | Mean             | SD   | Mean            | SD   | Mean               | SD   |                 |             |
| Log of interferon gamma                                | 5.51             | 0.40 | 5.51            | 0.42 | 5.51               | 0.39 | -0.07<br>(84)   | 0.942       |
| Log of tumor necrosis factor alpha<br>(TNF- $\alpha$ ) | 4.66             | 0.25 | 4.68            | 0.30 | 4.65               | 0.23 | 0.44<br>(74)    | 0.658       |
| Log of IL-1 $\beta$                                    | 2.32             | 0.44 | 2.32            | 0.42 | 2.33               | 0.44 | -0.13<br>(95)   | 0.894       |
| Log of IL-1 receptor antagonist                        | 6.26             | 0.49 | 6.30            | 0.65 | 6.24               | 0.40 | 0.61<br>(64)    | 0.545       |
| Log of IL-4                                            | 2.18             | 0.27 | 2.20            | 0.28 | 2.17               | 0.27 | 0.55<br>(86)    | 0.586       |
| Log of IL-5                                            | 4.14             | 0.28 | 4.13            | 0.27 | 4.14               | 0.29 | -0.09<br>(97)   | 0.929       |
| Log of IL-6                                            | 2.79             | 0.35 | 2.85            | 0.44 | 2.77               | 0.30 | 1.15<br>(63)    | 0.254       |
| Log of IL-8                                            | 3.40             | 0.72 | 3.43            | 0.78 | 3.39               | 0.69 | 0.33<br>(81)    | 0.740       |
| Log of IL-9                                            | 3.16             | 0.66 | 3.24            | 0.86 | 3.08               | 0.56 | 1.16<br>(66)    | 0.25        |
| Log of IL-13                                           | 2.74             | 0.91 | 2.93            | 0.94 | 2.67               | 0.89 | 1.71<br>(86)    | 0.090       |

|                                                         |      |      |      |      |      |      |                |       |
|---------------------------------------------------------|------|------|------|------|------|------|----------------|-------|
| Log of macrophage inflammatory protein (MIP)-1 $\alpha$ | 2.16 | 0.33 | 2.12 | 0.28 | 2.17 | 0.35 | -1.06<br>(111) | 0.293 |
| Log of MIP-1 $\beta$                                    | 4.45 | 0.45 | 4.49 | 0.46 | 4.43 | 0.45 | 0.75<br>(90)   | 0.454 |
| Log of IL-17                                            | 4.56 | 0.40 | 4.56 | 0.39 | 4.57 | 0.41 | -0.17<br>(93)  | 0.865 |
